# Supplementary material
Source: publisher figshare collection journal article supplement (https://gsajournals.figshare.com/ndownloader/files/16532030)
Supplement: Supplementary file 1 [file 16532030]

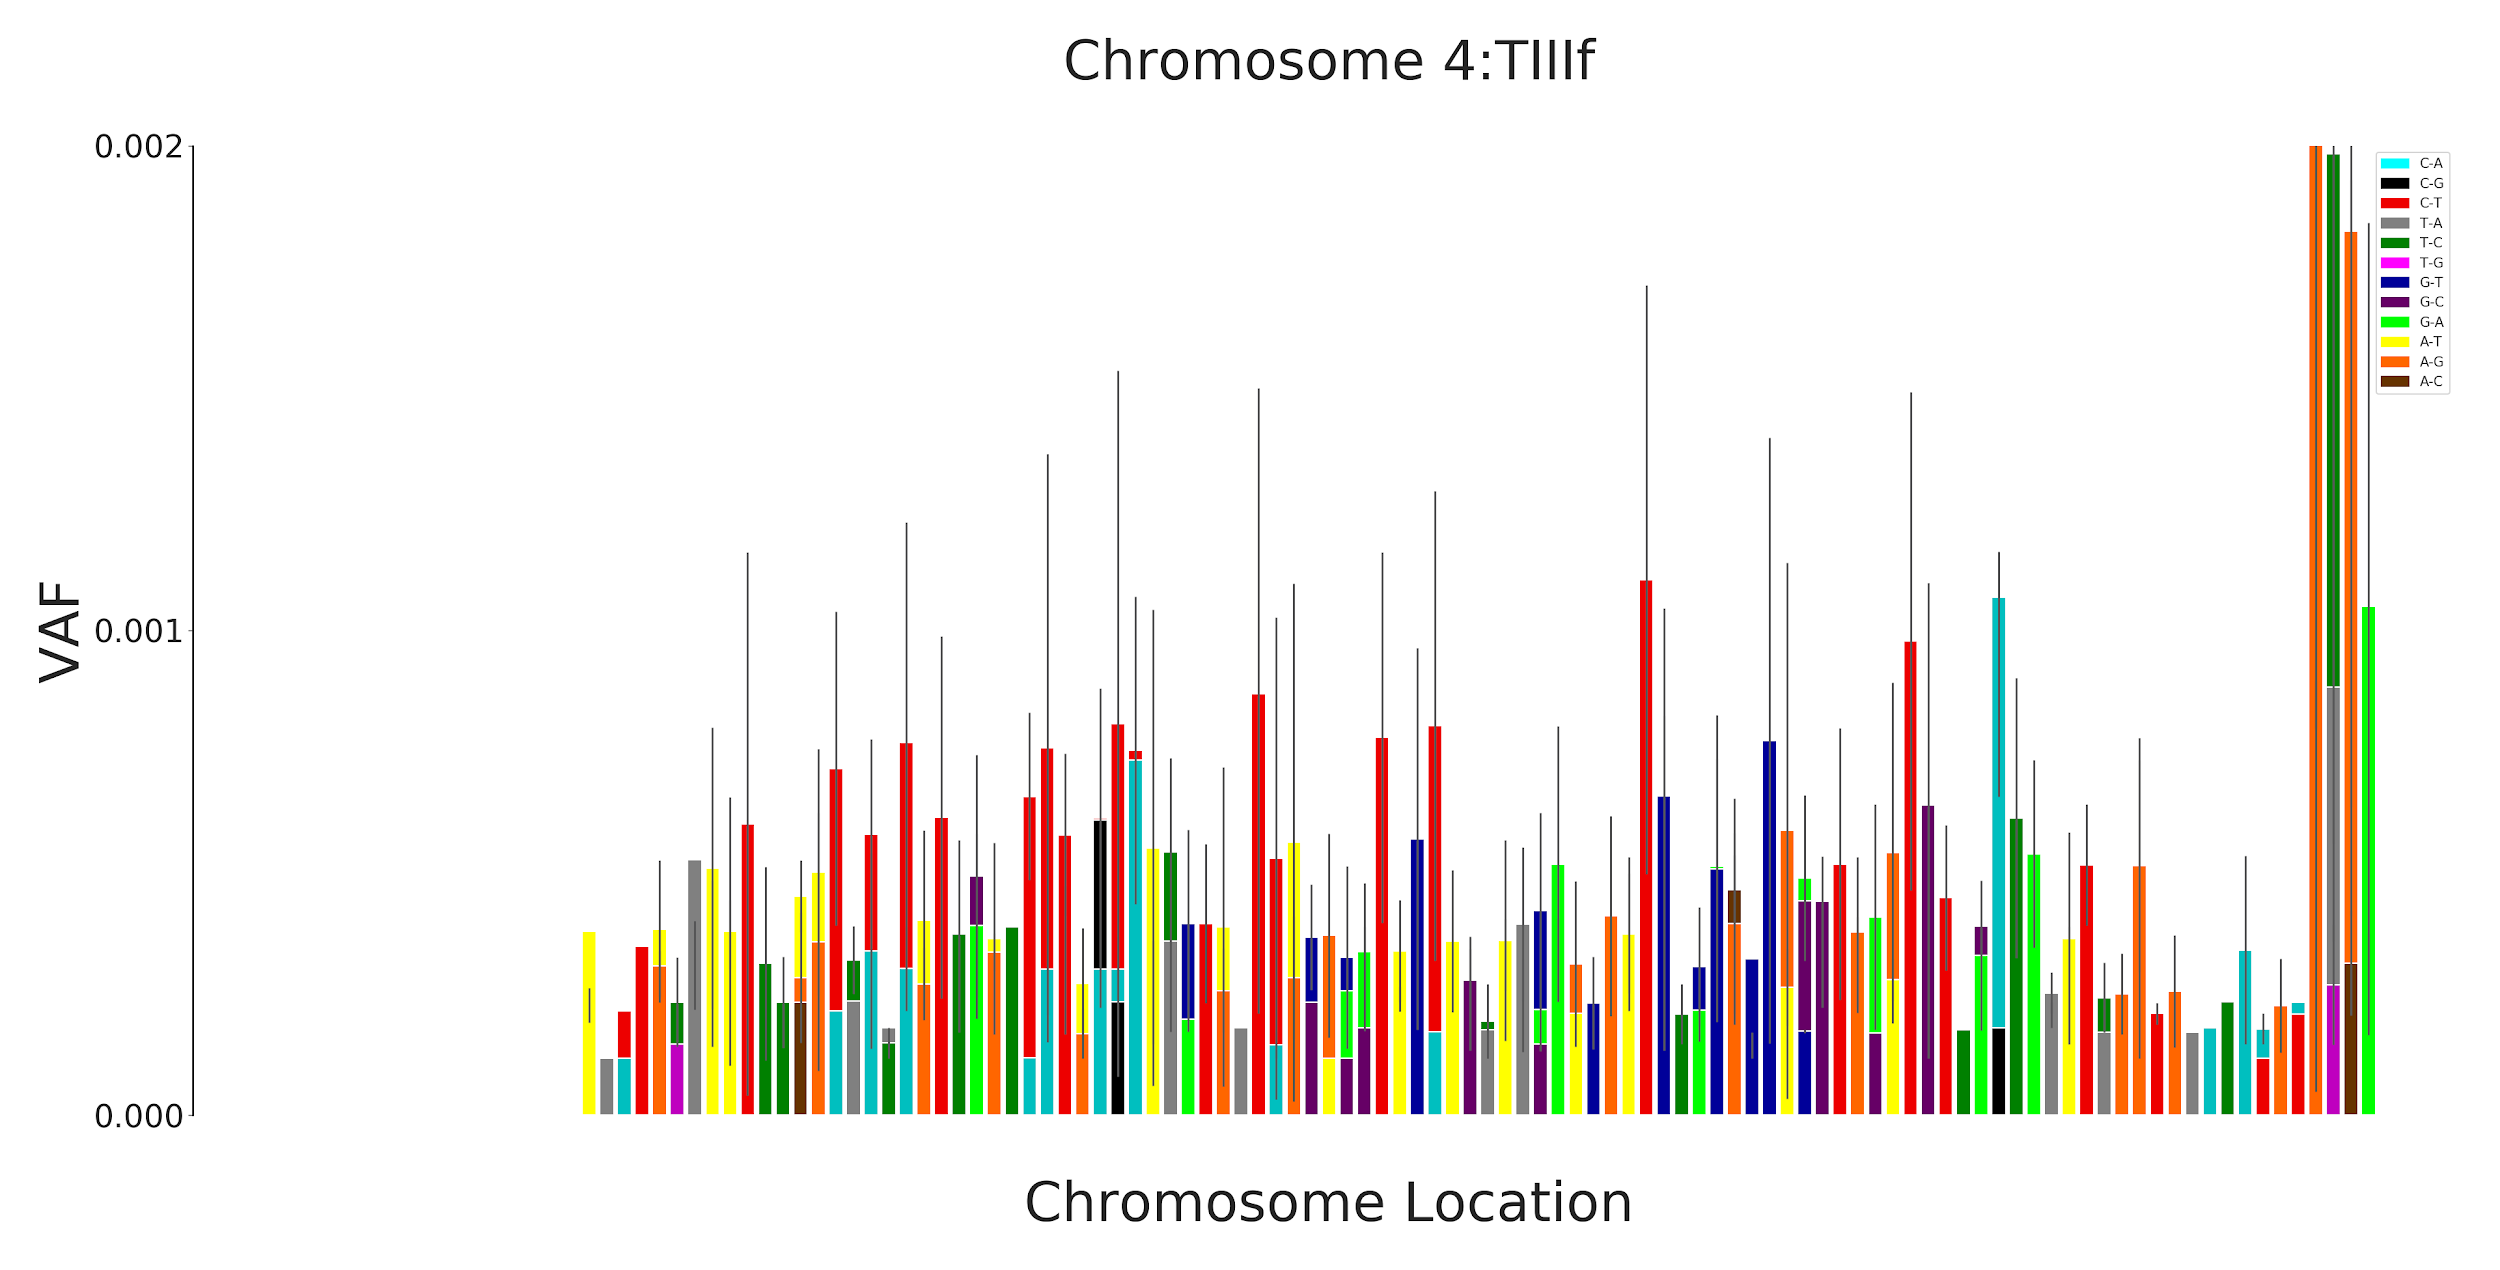


## Figure S1

**Sperm gDNA shows similar background to blood samples.**

Use of FERMI to sequence 12 samples of sperm gDNA shows a significant signal within uncorrected consensus reads. Work from other groups robustly shows that any given sperm cell should contain about 100 mutations, confirming the presence of a widespread background signal within our uncorrected consensus reads [(Lynch 2016)](https://paperpile.com/c/6qVm8a/C9fZ2).
